# Supplementary material for: Under-Reporting of COVID-19 Cases Among Indigenous Peoples in Brazil: A New Expression of Old Inequalities
Source: Front Psychiatry. 2021 Apr 12;12:638359. doi: 10.3389/fpsyt.2021.638359 (PMC8071995; doi:10.3389/fpsyt.2021.638359)
Supplement: Supplementary file 1 [file Table_1.XLSX]

## Sheet: SemEpi_Casos_UF_BR_COAIB_SESAI
New cases of Covid19, notified between 23/02/2020 to 03/10/2020, according geographical area, general population and indigenous population
	Brazil	Legal Amazon	Sesai	Coiab	Rondonia	Acre	Amazonas	Roraima	Para	Amapa	Tocantins	Maranhao	Mato Grosso
Epidemiological Weeks	n	n	n	n	n	n	n	n	n	n	n	n	n
9	2	0	0	0	0	0	0	0	0	0	0	0	0
10	17	0	0	0	0	0	0	0	0	0	0	0	0
11	102	0	0	0	0	0	0	0	0	0	0	0	0
12	1007	29	0	0	1	9	11	0	2	1	2	1	2
13	2775	182	0	0	5	16	100	12	15	3	7	13	11
14	6375	460	0	0	5	21	200	25	63	24	5	74	43
15	10449	1457	7	8	22	26	739	38	137	165	9	256	65
16	15872	2499	10	18	77	70	847	126	423	200	10	696	50
17	21910	4605	65	67	218	116	1738	144	939	292	17	1065	76
18	37887	7678	16	24	325	295	2427	323	1881	502	141	1700	84
19	59543	15922	38	109	610	782	5863	534	3315	1306	381	2960	171
20	77203	23077	109	134	656	532	7752	504	6409	1341	707	4827	349
21	114256	33580	125	157	1190	2000	9125	668	9513	2257	1151	7175	501
22	151042	50756	680	778	1634	2205	11758	925	14599	3222	1551	13853	1009
23	174406	49589	183	1008	2957	1453	8225	1939	15880	3460	1524	12850	1301
24	177668	50424	888	1140	4010	2009	7241	1604	15334	3549	1426	13389	1862
25	217065	48189	1217	1697	3242	1729	6876	1195	14371	5252	1272	10814	3438
26	246088	54937	784	956	4319	1650	6120	5041	16432	6327	1763	8442	4843
27	263337	52551	2084	2325	3686	1574	6923	5691	13218	1908	2316	10942	6293
28	262846	48906	1504	1515	3539	1593	7285	3080	12403	1470	2657	9341	7538
29	235010	44579	2253	2276	2621	1122	7304	3524	12013	2306	2270	7694	5725
30	319653	48006	423	443	6456	1362	5181	3927	10439	1457	3147	7238	8799
31	313364	46078	1411	1415	3931	1273	5683	3329	8130	1433	4426	8018	9855
32	304535	50293	2653	3116	4362	1568	4651	3210	11046	1544	5757	8119	10036
33	304684	46174	1530	1575	3786	1018	4813	3464	9911	1292	5375	6580	9935
34	265266	46115	1131	1132	3343	1149	4128	2130	11634	1600	6361	7593	8177
35	263791	44899	1434	1864	3501	936	4490	1772	9602	1740	6812	7022	9024
36	276847	40295	728	732	3369	807	3867	1676	8618	1911	5424	6949	7674
37	192687	31708	259	265	2497	740	3213	1373	6791	1107	4320	4632	7035
38	212553	33321	1203	1206	2335	913	4634	1740	6550	949	3772	4857	7571
39	189751	31860	759	763	2226	798	4596	1593	6621	1007	3349	4147	7523
40	188842	30461	633	633	1653	803	5968	1617	6976	857	2882	3738	5967
Accumulated	4906833	941425	22127	25356	66576	28662	142137	51298	233802	48602	69398	175218	125732
Source: https://covid.saude.gov.br/, updated in 03/10/2020

## Sheet: SemEpi_Óbitos_UF_BR_COAIB_SESAI
Death for Covid19, notified between 23/02/2020 to 03/10/2020, according geographical area, general population and indigenous population
	Brazil	Legal Amazon	Sesai	Coiab	Rondonia	Acre	Amazonas	Roraima	Para	Amapa	Tocantins	Maranhao	Mato Grosso
Epidemiological Weeks	n	n	n	n	n	n	n	n	n	n	n	n	n
9	0	0	0	0	0	0	0	0	0	0	0	0	0
10	0	0	0	0	0	0	0	0	0	0	0	0	0
11	0	0	0	0	0	0	0	0	0	0	0	0	0
12	18	0	1	1	0	0	0	0	0	0	0	0	0
13	96	1	0	0	0	0	1	0	0	0	0	0	0
14	318	17	0	0	1	0	11	1	1	1	0	1	1
15	692	79	0	3	1	2	41	2	9	2	0	20	2
16	1223	168	1	2	1	3	108	0	23	7	1	23	2
17	1669	259	1	7	4	6	126	0	53	9	1	56	4
18	2708	583	2	3	16	10	214	6	187	21	2	124	3
19	3903	980	5	18	18	18	461	9	305	29	5	131	4
20	5006	1350	6	45	28	20	413	31	621	39	18	169	11
21	6380	1563	6	13	46	28	369	32	802	54	24	198	10
22	6821	1625	25	53	36	55	303	29	899	53	20	210	20
23	7096	1380	18	55	77	59	185	29	712	54	25	200	39
24	6790	1476	21	44	81	55	233	58	565	50	34	304	96
25	7256	1178	14	49	100	41	185	48	342	34	37	248	143
26	7094	1122	10	27	67	54	122	36	315	53	24	259	192
27	7195	1105	36	51	72	40	146	83	235	35	24	242	228
28	7204	1022	24	40	69	28	105	32	205	32	36	241	274
29	7303	1054	30	67	69	38	106	33	204	32	37	250	285
30	7677	935	2	2	124	23	61	44	166	47	46	190	234
31	7114	773	20	28	71	52	68	40	61	14	50	134	283
32	6914	745	41	51	59	24	86	34	121	33	54	122	212
33	6755	701	16	16	72	17	99	21	61	12	62	99	258
34	7018	653	8	12	49	22	94	11	115	17	67	87	191
35	6212	615	15	28	64	10	77	8	62	29	85	84	196
36	5741	781	13	24	55	16	207	11	131	12	87	75	187
37	5007	500	1	9	60	13	47	12	67	7	54	70	170
38	5322	588	2	4	57	11	68	3	144	13	67	74	151
39	4874	480	8	9	36	8	66	24	83	11	51	71	130
40	4581	520	4	9	38	11	147	24	59	13	49	73	106
Accumulated	145987	22379	330	670	1371	667	4169	661	6593	715	966	3787	3450
Source: https://covid.saude.gov.br/, updated in 03/10/2020

## Sheet: Incidence_Mortality_Rates
	Area	Population	Incidence Rate	Mortality Rate	Letality Rate	Risk Increase Incidence*	Risk Increase Mortality**
	Brazil	210147125	2334.95	69.4689	0.0297518	--	--
	Legal Amazon	28990627	3247.34	77.1939	0.0237714	1.39075	1.1112
	COIAB	527735	5524.52	145.978	0.026	2.36601	2.10135
	SESAI	458972	4820.99	71.8998	0.015	2.06471	1.03499
	Rondonia	1777225	3746.06	77.1427	0.020593	1.60434	1.11046
	Acre	881935	3249.9	75.6292	0.0232712	1.39185	1.08868
	Amazonas	4144597	3429.45	100.589	0.0293309	1.46875	1.44797
	Roraima	605761	8468.36	109.119	0.0128855	3.62678	1.57076
	Para	8602865	2717.72	76.6373	0.0281991	1.16393	1.10319
	Amapa	845731	5746.74	84.5422	0.0147065	2.46118	1.21698
	Tocantins	1572866	4412.2	61.4165	0.0139197	1.88963	0.884086
	Maranhao	7075181	2476.52	53.5251	0.0216131	1.06063	0.77049
	Mato Grosso	3484466	3608.36	99.0109	0.0274393	1.54537	1.42525
	Source: https://covid.saude.gov.br/, updated in 03/10/2020
	* Risk related to Incidence Rate in Brazil
	** Risk related to Mortality Rate in Brazil

## Sheet: Incidence_Mortality_Rates_BR_AL
	Area	Population	Incidence Rate	Mortality Rate	Letality	Risk Increase Incidence*	Risk Increase Mortality**
	Brasil	210147125	2334.95	69.4689	2.97518	--	--
	Legal Amazonian	28990627	3247.34	77.1939	2.37714	1.39075	1.1112
	Sesai	458972	4820.99	71.8998	1.5	2.06471	1.03499
	Coiab	527735	5524.52	145.978	2.6	2.36601	2.10135
	Source: https://covid.saude.gov.br/, updated in 03/10/2020
	* Risk related to Incidence Rate in Brazil
	** Risk related to Mortality Rate in Brazil
